# Supplementary material
Source: publisher figshare collection journal article supplement (https://acs.figshare.com/ndownloader/files/4576975)
Supplement: Supplementary file 1 [file 4576975]

  
data_4 
  
_audit_creation_method            SHELXL-97 
_chemical_name_systematic 
; 
 ? 
; 
_chemical_name_common             ? 
_chemical_melting_point           ? 
_chemical_formula_moiety          ? 
_chemical_formula_sum 
 'C304 Cu48 Mo48 N4 O461.20 Si4' 
_chemical_formula_weight          18854.16 
  
loop_ 
 _atom_type_symbol 
 _atom_type_description 
 _atom_type_scat_dispersion_real 
 _atom_type_scat_dispersion_imag 
 _atom_type_scat_source 
 'C'  'C'   0.0033   0.0016 
 'International Tables Vol C Tables 4.2.6.8 and 6.1.1.4' 
 'H'  'H'   0.0000   0.0000 
 'International Tables Vol C Tables 4.2.6.8 and 6.1.1.4' 
 'N'  'N'   0.0061   0.0033 
 'International Tables Vol C Tables 4.2.6.8 and 6.1.1.4' 
 'O'  'O'   0.0106   0.0060 
 'International Tables Vol C Tables 4.2.6.8 and 6.1.1.4' 
 'Si'  'Si'   0.0817   0.0704 
 'International Tables Vol C Tables 4.2.6.8 and 6.1.1.4' 
 'Cu'  'Cu'   0.3201   1.2651 
 'International Tables Vol C Tables 4.2.6.8 and 6.1.1.4' 
 'Mo'  'Mo'  -1.6832   0.6857 
 'International Tables Vol C Tables 4.2.6.8 and 6.1.1.4' 
  
_symmetry_cell_setting            Cubic 
_symmetry_space_group_name_H-M    Fm-3m 
  
loop_ 
 _symmetry_equiv_pos_as_xyz 
 'x, y, z' 
 '-x, -y, z' 
 '-x, y, -z' 
 'x, -y, -z' 
 'z, x, y' 
 'z, -x, -y' 
 '-z, -x, y' 
 '-z, x, -y' 
 'y, z, x' 
 '-y, z, -x' 
 'y, -z, -x' 
 '-y, -z, x' 
 'y, x, -z' 
 '-y, -x, -z' 
 'y, -x, z' 
 '-y, x, z' 
 'x, z, -y' 
 '-x, z, y' 
 '-x, -z, -y' 
 'x, -z, y' 
 'z, y, -x' 
 'z, -y, x' 
 '-z, y, x' 
 '-z, -y, -x' 
 'x, y+1/2, z+1/2' 
 '-x, -y+1/2, z+1/2' 
 '-x, y+1/2, -z+1/2' 
 'x, -y+1/2, -z+1/2' 
 'z, x+1/2, y+1/2' 
 'z, -x+1/2, -y+1/2' 
 '-z, -x+1/2, y+1/2' 
 '-z, x+1/2, -y+1/2' 
 'y, z+1/2, x+1/2' 
 '-y, z+1/2, -x+1/2' 
 'y, -z+1/2, -x+1/2' 
 '-y, -z+1/2, x+1/2' 
 'y, x+1/2, -z+1/2' 
 '-y, -x+1/2, -z+1/2' 
 'y, -x+1/2, z+1/2' 
 '-y, x+1/2, z+1/2' 
 'x, z+1/2, -y+1/2' 
 '-x, z+1/2, y+1/2' 
 '-x, -z+1/2, -y+1/2' 
 'x, -z+1/2, y+1/2' 
 'z, y+1/2, -x+1/2' 
 'z, -y+1/2, x+1/2' 
 '-z, y+1/2, x+1/2' 
 '-z, -y+1/2, -x+1/2' 
 'x+1/2, y, z+1/2' 
 '-x+1/2, -y, z+1/2' 
 '-x+1/2, y, -z+1/2' 
 'x+1/2, -y, -z+1/2' 
 'z+1/2, x, y+1/2' 
 'z+1/2, -x, -y+1/2' 
 '-z+1/2, -x, y+1/2' 
 '-z+1/2, x, -y+1/2' 
 'y+1/2, z, x+1/2' 
 '-y+1/2, z, -x+1/2' 
 'y+1/2, -z, -x+1/2' 
 '-y+1/2, -z, x+1/2' 
 'y+1/2, x, -z+1/2' 
 '-y+1/2, -x, -z+1/2' 
 'y+1/2, -x, z+1/2' 
 '-y+1/2, x, z+1/2' 
 'x+1/2, z, -y+1/2' 
 '-x+1/2, z, y+1/2' 
 '-x+1/2, -z, -y+1/2' 
 'x+1/2, -z, y+1/2' 
 'z+1/2, y, -x+1/2' 
 'z+1/2, -y, x+1/2' 
 '-z+1/2, y, x+1/2' 
 '-z+1/2, -y, -x+1/2' 
 'x+1/2, y+1/2, z' 
 '-x+1/2, -y+1/2, z' 
 '-x+1/2, y+1/2, -z' 
 'x+1/2, -y+1/2, -z' 
 'z+1/2, x+1/2, y' 
 'z+1/2, -x+1/2, -y' 
 '-z+1/2, -x+1/2, y' 
 '-z+1/2, x+1/2, -y' 
 'y+1/2, z+1/2, x' 
 '-y+1/2, z+1/2, -x' 
 'y+1/2, -z+1/2, -x' 
 '-y+1/2, -z+1/2, x' 
 'y+1/2, x+1/2, -z' 
 '-y+1/2, -x+1/2, -z' 
 'y+1/2, -x+1/2, z' 
 '-y+1/2, x+1/2, z' 
 'x+1/2, z+1/2, -y' 
 '-x+1/2, z+1/2, y' 
 '-x+1/2, -z+1/2, -y' 
 'x+1/2, -z+1/2, y' 
 'z+1/2, y+1/2, -x' 
 'z+1/2, -y+1/2, x' 
 '-z+1/2, y+1/2, x' 
 '-z+1/2, -y+1/2, -x' 
 '-x, -y, -z' 
 'x, y, -z' 
 'x, -y, z' 
 '-x, y, z' 
 '-z, -x, -y' 
 '-z, x, y' 
 'z, x, -y' 
 'z, -x, y' 
 '-y, -z, -x' 
 'y, -z, x' 
 '-y, z, x' 
 'y, z, -x' 
 '-y, -x, z' 
 'y, x, z' 
 '-y, x, -z' 
 'y, -x, -z' 
 '-x, -z, y' 
 'x, -z, -y' 
 'x, z, y' 
 '-x, z, -y' 
 '-z, -y, x' 
 '-z, y, -x' 
 'z, -y, -x' 
 'z, y, x' 
 '-x, -y+1/2, -z+1/2' 
 'x, y+1/2, -z+1/2' 
 'x, -y+1/2, z+1/2' 
 '-x, y+1/2, z+1/2' 
 '-z, -x+1/2, -y+1/2' 
 '-z, x+1/2, y+1/2' 
 'z, x+1/2, -y+1/2' 
 'z, -x+1/2, y+1/2' 
 '-y, -z+1/2, -x+1/2' 
 'y, -z+1/2, x+1/2' 
 '-y, z+1/2, x+1/2' 
 'y, z+1/2, -x+1/2' 
 '-y, -x+1/2, z+1/2' 
 'y, x+1/2, z+1/2' 
 '-y, x+1/2, -z+1/2' 
 'y, -x+1/2, -z+1/2' 
 '-x, -z+1/2, y+1/2' 
 'x, -z+1/2, -y+1/2' 
 'x, z+1/2, y+1/2' 
 '-x, z+1/2, -y+1/2' 
 '-z, -y+1/2, x+1/2' 
 '-z, y+1/2, -x+1/2' 
 'z, -y+1/2, -x+1/2' 
 'z, y+1/2, x+1/2' 
 '-x+1/2, -y, -z+1/2' 
 'x+1/2, y, -z+1/2' 
 'x+1/2, -y, z+1/2' 
 '-x+1/2, y, z+1/2' 
 '-z+1/2, -x, -y+1/2' 
 '-z+1/2, x, y+1/2' 
 'z+1/2, x, -y+1/2' 
 'z+1/2, -x, y+1/2' 
 '-y+1/2, -z, -x+1/2' 
 'y+1/2, -z, x+1/2' 
 '-y+1/2, z, x+1/2' 
 'y+1/2, z, -x+1/2' 
 '-y+1/2, -x, z+1/2' 
 'y+1/2, x, z+1/2' 
 '-y+1/2, x, -z+1/2' 
 'y+1/2, -x, -z+1/2' 
 '-x+1/2, -z, y+1/2' 
 'x+1/2, -z, -y+1/2' 
 'x+1/2, z, y+1/2' 
 '-x+1/2, z, -y+1/2' 
 '-z+1/2, -y, x+1/2' 
 '-z+1/2, y, -x+1/2' 
 'z+1/2, -y, -x+1/2' 
 'z+1/2, y, x+1/2' 
 '-x+1/2, -y+1/2, -z' 
 'x+1/2, y+1/2, -z' 
 'x+1/2, -y+1/2, z' 
 '-x+1/2, y+1/2, z' 
 '-z+1/2, -x+1/2, -y' 
 '-z+1/2, x+1/2, y' 
 'z+1/2, x+1/2, -y' 
 'z+1/2, -x+1/2, y' 
 '-y+1/2, -z+1/2, -x' 
 'y+1/2, -z+1/2, x' 
 '-y+1/2, z+1/2, x' 
 'y+1/2, z+1/2, -x' 
 '-y+1/2, -x+1/2, z' 
 'y+1/2, x+1/2, z' 
 '-y+1/2, x+1/2, -z' 
 'y+1/2, -x+1/2, -z' 
 '-x+1/2, -z+1/2, y' 
 'x+1/2, -z+1/2, -y' 
 'x+1/2, z+1/2, y' 
 '-x+1/2, z+1/2, -y' 
 '-z+1/2, -y+1/2, x' 
 '-z+1/2, y+1/2, -x' 
 'z+1/2, -y+1/2, -x' 
 'z+1/2, y+1/2, x' 
  
_cell_length_a                    26.3034(9) 
_cell_length_b                    26.3034(9) 
_cell_length_c                    26.3034(9) 
_cell_angle_alpha                 90.00 
_cell_angle_beta                  90.00 
_cell_angle_gamma                 90.00 
_cell_volume                      18198.5(11) 
_cell_formula_units_Z             1 
_cell_measurement_temperature     296(2) 
_cell_measurement_reflns_used     4237 
_cell_measurement_theta_min       2.57 
_cell_measurement_theta_max       22.23 
  
_exptl_crystal_description        ? 
_exptl_crystal_colour             Green 
_exptl_crystal_size_max           0.13 
_exptl_crystal_size_mid           0.12 
_exptl_crystal_size_min           0.10 
_exptl_crystal_density_meas       0 
_exptl_crystal_density_diffrn     1.720 
_exptl_crystal_density_method     'not measured' 
_exptl_crystal_F_000              14124 
_exptl_absorpt_coefficient_mu     2.266 
_exptl_absorpt_correction_type    'multi-scan' 
_exptl_absorpt_correction_T_min   0.750 
_exptl_absorpt_correction_T_max   0.798 
_exptl_absorpt_process_details    'ABSCOR by T.Higashi    8 March, 1995' 
  
_exptl_special_details 
; 
 ? 
; 
  
_diffrn_ambient_temperature       296(2) 
_diffrn_radiation_wavelength      0.71073 
_diffrn_radiation_type            MoK\a 
_diffrn_radiation_source          'fine-focus sealed tube' 
_diffrn_radiation_monochromator   graphite 
_diffrn_measurement_device_type   'CCD area detector' 
_diffrn_measurement_method        'phi and omega scans' 
_diffrn_detector_area_resol_mean  ? 
_diffrn_standards_number          ? 
_diffrn_standards_interval_count  ? 
_diffrn_standards_interval_time   ? 
_diffrn_standards_decay_%         ? 
_diffrn_reflns_number             24556 
_diffrn_reflns_av_R_equivalents   0.0513 
_diffrn_reflns_av_sigmaI/netI     0.0151 
_diffrn_reflns_limit_h_min        -31 
_diffrn_reflns_limit_h_max        24 
_diffrn_reflns_limit_k_min        -29 
_diffrn_reflns_limit_k_max        31 
_diffrn_reflns_limit_l_min        -31 
_diffrn_reflns_limit_l_max        24 
_diffrn_reflns_theta_min          1.34 
_diffrn_reflns_theta_max          25.55 
_reflns_number_total              921 
_reflns_number_gt                 831 
_reflns_threshold_expression      >2sigma(I) 
  
_computing_data_collection        'Bruker SMART' 
_computing_cell_refinement        'Bruker SMART' 
_computing_data_reduction         'Bruker SAINT' 
_computing_structure_solution     'SHELXS-97 (Sheldrick, 1990)' 
_computing_structure_refinement   'SHELXL-97 (Sheldrick, 1997)' 
_computing_molecular_graphics     'Bruker SHELXTL' 
_computing_publication_material   'Bruker SHELXTL' 
  
_refine_special_details 
; 
 Refinement of F^2^ against ALL reflections.  The weighted R-factor wR and 
 goodness of fit S are based on F^2^, conventional R-factors R are based 
 on F, with F set to zero for negative F^2^. The threshold expression of 
 F^2^ > 2sigma(F^2^) is used only for calculating R-factors(gt) etc. and is 
 not relevant to the choice of reflections for refinement.  R-factors based 
 on F^2^ are statistically about twice as large as those based on F, and R- 
 factors based on ALL data will be even larger. 
; 
  
_refine_ls_structure_factor_coef  Fsqd 
_refine_ls_matrix_type            full 
_refine_ls_weighting_scheme       calc 
_refine_ls_weighting_details 
 'calc w=1/[\s^2^(Fo^2^)+(0.1413P)^2^+273.9491P] where P=(Fo^2^+2Fc^2^)/3' 
_atom_sites_solution_primary      direct 
_atom_sites_solution_secondary    difmap 
_atom_sites_solution_hydrogens    ? 
_refine_ls_hydrogen_treatment     ? 
_refine_ls_extinction_method      SHELXL 
_refine_ls_extinction_coef        0.00017(4) 
_refine_ls_extinction_expression 
 'Fc^*^=kFc[1+0.001xFc^2^\l^3^/sin(2\q)]^-1/4^' 
_refine_ls_number_reflns          921 
_refine_ls_number_parameters      65 
_refine_ls_number_restraints      0 
_refine_ls_R_factor_all           0.0709 
_refine_ls_R_factor_gt            0.0580 
_refine_ls_wR_factor_ref          0.1958 
_refine_ls_wR_factor_gt           0.1857 
_refine_ls_goodness_of_fit_ref    1.042 
_refine_ls_restrained_S_all       1.042 
_refine_ls_shift/su_max           0.000 
_refine_ls_shift/su_mean          0.000 
  
loop_ 
 _atom_site_label 
 _atom_site_type_symbol 
 _atom_site_fract_x 
 _atom_site_fract_y 
 _atom_site_fract_z 
 _atom_site_U_iso_or_equiv 
 _atom_site_adp_type 
 _atom_site_occupancy 
 _atom_site_symmetry_multiplicity 
 _atom_site_calc_flag 
 _atom_site_refinement_flags 
 _atom_site_disorder_assembly 
 _atom_site_disorder_group 
O1 O 0.0356(4) 0.5356(4) 0.0356(4) 0.029(3) Uani 0.50 6 d SP . . 
Cu1 Cu 0.21483(3) 0.21483(3) 0.0000 0.0238(5) Uani 1 4 d S . . 
Mo2 Mo 0.09468(3) 0.5000 0.09468(3) 0.0534(6) Uani 1 4 d S . . 
Si1 Si 0.0000 0.5000 0.0000 0.030(2) Uani 1 48 d S . . 
O5 O 0.25667(13) 0.18319(15) 0.05230(14) 0.0367(9) Uani 1 1 d . . . 
O2 O 0.1388(2) 0.5000 0.1388(2) 0.070(3) Uani 1 4 d S . . 
O4 O 0.1556(3) 0.1556(3) 0.0000 0.098(4) Uani 1 4 d S . . 
C1 C 0.29752(19) 0.20248(19) 0.0689(3) 0.0299(15) Uani 1 2 d S . . 
O3 O 0.1198(4) 0.4514(3) 0.0486(3) 0.096(3) Uani 1 2 d S . . 
C2 C 0.3017(3) 0.1336(2) 0.1336(2) 0.0333(16) Uani 1 2 d S . . 
C3 C 0.32324(19) 0.17676(19) 0.1122(3) 0.0315(15) Uani 1 2 d S . . 
O1W O 0.2496(8) 0.0751(9) 0.0000 0.115(9) Uiso 0.56(2) 2 d SP . . 
N1 N 0.2500 0.2500 0.2500 0.09(2) Uiso 0.50 24 d SP . . 
C111 C 0.2169(19) 0.2169(19) 0.2169(19) 0.16(3) Uiso 0.50 6 d SP . . 
O2W O 0.237(2) 0.0000 0.0000 0.08(2) Uiso 0.31(5) 8 d SP . . 
  
loop_ 
 _atom_site_aniso_label 
 _atom_site_aniso_U_11 
 _atom_site_aniso_U_22 
 _atom_site_aniso_U_33 
 _atom_site_aniso_U_23 
 _atom_site_aniso_U_13 
 _atom_site_aniso_U_12 
O1 0.029(3) 0.029(3) 0.029(3) -0.001(4) -0.001(4) -0.001(4) 
Cu1 0.0238(6) 0.0238(6) 0.0240(7) 0.000 0.000 -0.0036(4) 
Mo2 0.0502(6) 0.0596(8) 0.0502(6) 0.000 -0.0222(5) 0.000 
Si1 0.030(2) 0.030(2) 0.030(2) 0.000 0.000 0.000 
O5 0.034(2) 0.037(2) 0.0387(19) 0.0090(16) -0.0072(15) -0.0065(15) 
O2 0.060(4) 0.090(8) 0.060(4) 0.000 -0.027(5) 0.000 
O4 0.097(7) 0.097(7) 0.099(9) 0.000 0.000 -0.067(8) 
C1 0.032(2) 0.032(2) 0.027(3) 0.0016(19) -0.0016(19) -0.001(3) 
O3 0.099(6) 0.095(4) 0.095(4) -0.056(5) 0.057(4) -0.057(4) 
C2 0.034(4) 0.033(2) 0.033(2) 0.005(3) -0.005(2) -0.005(2) 
C3 0.032(2) 0.032(2) 0.031(4) 0.002(2) -0.002(2) -0.005(3) 
  
_geom_special_details 
; 
 All esds (except the esd in the dihedral angle between two l.s. planes) 
 are estimated using the full covariance matrix.  The cell esds are taken 
 into account individually in the estimation of esds in distances, angles 
 and torsion angles; correlations between esds in cell parameters are only 
 used when they are defined by crystal symmetry.  An approximate (isotropic) 
 treatment of cell esds is used for estimating esds involving l.s. planes. 
; 
  
loop_ 
 _geom_bond_atom_site_label_1 
 _geom_bond_atom_site_label_2 
 _geom_bond_distance 
 _geom_bond_site_symmetry_2 
 _geom_bond_publ_flag 
O1 Si1 1.620(17) . ? 
O1 Mo2 2.390(9) 29_554 ? 
O1 Mo2 2.390(9) 81_455 ? 
O1 Mo2 2.390(9) . ? 
Cu1 O5 1.948(4) 98 ? 
Cu1 O5 1.948(4) 110 ? 
Cu1 O5 1.948(4) 13 ? 
Cu1 O5 1.948(4) . ? 
Cu1 O4 2.204(10) . ? 
Cu1 Cu1 2.617(2) 169 ? 
Mo2 O2 1.640(9) . ? 
Mo2 O3 1.882(4) 84 ? 
Mo2 O3 1.882(4) 179 ? 
Mo2 O3 1.882(4) . ? 
Mo2 O3 1.882(4) 99_565 ? 
Mo2 O1 2.390(9) 99_565 ? 
Si1 O1 1.620(17) 97_565 ? 
Si1 O1 1.620(17) 100 ? 
Si1 O1 1.620(17) 2_565 ? 
Si1 O1 1.620(17) 98 ? 
Si1 O1 1.620(17) 3 ? 
Si1 O1 1.620(17) 99_565 ? 
Si1 O1 1.620(17) 4_565 ? 
O5 C1 1.266(5) . ? 
C1 O5 1.266(5) 181 ? 
C1 C3 1.486(10) . ? 
O3 Mo2 1.882(4) 30 ? 
C2 C3 1.389(5) 58 ? 
C2 C3 1.389(5) . ? 
C3 C2 1.389(5) 79 ? 
N1 C111 1.51(9) . ? 
N1 C111 1.51(9) 28 ? 
N1 C111 1.51(9) 74 ? 
N1 C111 1.51(9) 51 ? 
  
loop_ 
 _geom_angle_atom_site_label_1 
 _geom_angle_atom_site_label_2 
 _geom_angle_atom_site_label_3 
 _geom_angle 
 _geom_angle_site_symmetry_1 
 _geom_angle_site_symmetry_3 
 _geom_angle_publ_flag 
Si1 O1 Mo2 121.7(3) . 29_554 ? 
Si1 O1 Mo2 121.7(3) . 81_455 ? 
Mo2 O1 Mo2 94.9(5) 29_554 81_455 ? 
Si1 O1 Mo2 121.7(3) . . ? 
Mo2 O1 Mo2 94.9(5) 29_554 . ? 
Mo2 O1 Mo2 94.9(5) 81_455 . ? 
O5 Cu1 O5 168.8(2) 98 110 ? 
O5 Cu1 O5 89.1(2) 98 13 ? 
O5 Cu1 O5 89.8(2) 110 13 ? 
O5 Cu1 O5 89.8(2) 98 . ? 
O5 Cu1 O5 89.1(2) 110 . ? 
O5 Cu1 O5 168.8(2) 13 . ? 
O5 Cu1 O4 95.59(11) 98 . ? 
O5 Cu1 O4 95.59(11) 110 . ? 
O5 Cu1 O4 95.59(11) 13 . ? 
O5 Cu1 O4 95.59(11) . . ? 
O5 Cu1 Cu1 84.41(11) 98 169 ? 
O5 Cu1 Cu1 84.41(11) 110 169 ? 
O5 Cu1 Cu1 84.41(11) 13 169 ? 
O5 Cu1 Cu1 84.41(11) . 169 ? 
O4 Cu1 Cu1 180.0(3) . 169 ? 
O2 Mo2 O3 101.9(4) . 84 ? 
O2 Mo2 O3 101.9(4) . 179 ? 
O3 Mo2 O3 85.6(5) 84 179 ? 
O2 Mo2 O3 101.9(4) . . ? 
O3 Mo2 O3 89.5(4) 84 . ? 
O3 Mo2 O3 156.1(7) 179 . ? 
O2 Mo2 O3 101.9(4) . 99_565 ? 
O3 Mo2 O3 156.1(7) 84 99_565 ? 
O3 Mo2 O3 89.5(4) 179 99_565 ? 
O3 Mo2 O3 85.6(5) . 99_565 ? 
O2 Mo2 O1 157.0(3) . 99_565 ? 
O3 Mo2 O1 62.8(4) 84 99_565 ? 
O3 Mo2 O1 94.3(5) 179 99_565 ? 
O3 Mo2 O1 62.8(4) . 99_565 ? 
O3 Mo2 O1 94.3(5) 99_565 99_565 ? 
O2 Mo2 O1 157.0(3) . . ? 
O3 Mo2 O1 94.3(5) 84 . ? 
O3 Mo2 O1 62.8(4) 179 . ? 
O3 Mo2 O1 94.3(5) . . ? 
O3 Mo2 O1 62.8(4) 99_565 . ? 
O1 Mo2 O1 46.1(7) 99_565 . ? 
O1 Si1 O1 180.0(11) 97_565 . ? 
O1 Si1 O1 109.471(1) 97_565 100 ? 
O1 Si1 O1 70.529(2) . 100 ? 
O1 Si1 O1 70.529(3) 97_565 2_565 ? 
O1 Si1 O1 109.5 . 2_565 ? 
O1 Si1 O1 70.529(3) 100 2_565 ? 
O1 Si1 O1 109.471(1) 97_565 98 ? 
O1 Si1 O1 70.529(2) . 98 ? 
O1 Si1 O1 109.471(1) 100 98 ? 
O1 Si1 O1 180.0(11) 2_565 98 ? 
O1 Si1 O1 70.529(3) 97_565 3 ? 
O1 Si1 O1 109.5 . 3 ? 
O1 Si1 O1 70.529(3) 100 3 ? 
O1 Si1 O1 109.471(2) 2_565 3 ? 
O1 Si1 O1 70.529(2) 98 3 ? 
O1 Si1 O1 109.471(1) 97_565 99_565 ? 
O1 Si1 O1 70.529(1) . 99_565 ? 
O1 Si1 O1 109.471(1) 100 99_565 ? 
O1 Si1 O1 70.529(1) 2_565 99_565 ? 
O1 Si1 O1 109.471(4) 98 99_565 ? 
O1 Si1 O1 180.0(11) 3 99_565 ? 
O1 Si1 O1 70.529(1) 97_565 4_565 ? 
O1 Si1 O1 109.471(4) . 4_565 ? 
O1 Si1 O1 180.0(11) 100 4_565 ? 
O1 Si1 O1 109.471(1) 2_565 4_565 ? 
O1 Si1 O1 70.529(2) 98 4_565 ? 
O1 Si1 O1 109.471(1) 3 4_565 ? 
O1 Si1 O1 70.529(2) 99_565 4_565 ? 
C1 O5 Cu1 123.5(4) . . ? 
O5 C1 O5 124.1(6) 181 . ? 
O5 C1 C3 117.9(3) 181 . ? 
O5 C1 C3 117.9(3) . . ? 
Mo2 O3 Mo2 138.7(6) 30 . ? 
C3 C2 C3 119.8(7) 58 . ? 
C2 C3 C2 120.2(7) 79 . ? 
C2 C3 C1 119.8(4) 79 . ? 
C2 C3 C1 119.8(4) . . ? 
C111 N1 C111 109.471(7) . 28 ? 
C111 N1 C111 109.471(8) . 74 ? 
C111 N1 C111 109.47(2) 28 74 ? 
C111 N1 C111 109.471(5) . 51 ? 
C111 N1 C111 109.471(5) 28 51 ? 
C111 N1 C111 109.47(2) 74 51 ? 
  
_diffrn_measured_fraction_theta_max    1.000 
_diffrn_reflns_theta_full              25.55 
_diffrn_measured_fraction_theta_full   1.000 
_refine_diff_density_max    1.700 
_refine_diff_density_min   -1.060 
_refine_diff_density_rms    0.314 
